# Supplementary material for: A Comprehensive Evaluation of Metabolomics Data Preprocessing Methods for Deep Learning
Source: MDPI journal article supplement (doi:10.3390/metabo12030202), 2022-02-24
Supplement: s1 [file s1]

## Supplementary Materials:

**Table S1:** Classification results for Dataset 1 using a feedforward MLP with a hidden layer size of 8 units as described in the Methods section.

- The “label” column provides an abbreviated description of the model.
- The “Training\_Train\_Error\_itersToValue” column provides the number of training iterations required to reach the minimum model error on the training dataset.
- The “Validation\_Test\_Error\_itersToValue” column provides the number of training iterations required to reach the minimum model error on the test dataset.
- The “Training\_AccuracyMCMicro\_itersToValue” column provides the number of training iterations required to reach the maximum model accuracy on the training dataset.
- The “Validation\_AccuracyMCMicro\_itersToValue” column provides the number of training iterations required to reach the maximum model accuracy on the test dataset.
- The “Training\_Train\_Error” column provides the model error on the training data.
- The “Validation\_Test\_Error” column provides the model error on the test data.
- The “Training\_AccuracyMCMicro” column provides the model accuracy on the training data.
- The “Validation\_AccuracyMCMicro” column provides the model accuracy on the test data.
- The “Training\_PrecisionMCMicro” column provides the model precision on the training data.
- The “Validation\_PrecisionMCMicro” column provides the model precision on the test data.
- The “BN” column provides the abbreviation for the biomass normalization method used.
- The “Impute” column provides the abbreviation for the missing value imputation method used.
- The “Trans” column provides the abbreviation for the data transformation method used.
- The “Rep” column provides the model replicate number.

**Table S2:** Classification results for Dataset 2 using a feedforward MLP with a hidden layer size of 8 units as described in the Methods section. The table columns are the same as in Table S1.

**Table S3:** Classification results for Dataset 2 using a feedforward MLP with a hidden layer size of 2 units. All other parameters are the same as those described in the Methods section. The table columns are the same as in Table S1.

**Table S4:** Reconstruction results for Dataset 1 using a VAE architecture as described in the Methods section. The table columns correspond to the following:

- The “label” column provides an abbreviated description of the model.
- The “Training\_Train\_Error\_itersToValue” column provides the number of training iterations to reach the minimum model error on the training data.
- The “Validation\_Test\_Error\_itersToValue” column provides the number of training iterations to reach the minimum model error on the test data.
- The “Training\_Train\_Error” column provides the model error on the training data.
- The “Validation\_Test\_Error” column provides the model error on the test data.
- The “Training\_CosineSimilarity-Mean” column provides the model mean cosine similarity score on the training data.
- The “Validation\_CosineSimilarity-Mean” column provides the model mean using cosine similarity score on the test data.
- The “Training\_CosineSimilarity-Var” column provides the model cosine similarity variance on the training data.
- The “Validation\_CosineSimilarity-Var” column model cosine similarity variance on the test data.
- The “Training\_PearsonR-Mean” column provides the model mean Pearson R score on the training data.
- The “Validation\_PearsonR-Mean” column provides the model mean Pearson R score on the test data.
- The “Training\_PearsonR-Var” column provides the model Pearson R variance on the training data.
- The “Validation\_PearsonR-Var” column provides the model Pearson R variance on the test data.
- The “Training\_EuclideanDist-Mean” column provides the model mean Euclidean Distance score on the training data.

- The “Validation\_EuclideanDist-Mean” column provides the model mean Euclidean Distance score on the test data.
- The “Training\_EuclideanDist-Var” column provides the model Euclidean Distance variance on the training data.
- The “Validation\_EuclideanDist-Var” column provides the model Euclidean Distance variance on the test data.
- The “Training\_ManhattanDist-Mean” column provides the model mean Manhattan Distance score on the training data.
- The “Validation\_ManhattanDist-Mean” column provides the model mean Manhattan Distance score on the test data.
- The “Training\_ManhattanDist-Var” column provides the model Manhattan Distance variance on the training data.
- The “Validation\_ManhattanDist-Var” column provides the model Manhattan Distance variance on the test data.
- The “Training\_JeffreysAndMatusitaDist-Mean” column provides the model mean Jeffrey’s and Matusita Distance score on the training data.
- The “Validation\_JeffreysAndMatusitaDist-Mean” column provides the model mean cosine similarity score on the training data.
- The “Training\_JeffreysAndMatusitaDist-Var” column provides the model Jeffrey’s and Matusita Distance variance on the training data.
- The “Validation\_JeffreysAndMatusitaDist-Var” column provides the model Jeffrey’s and Matusita Distance variance on the test data.
- The “Training\_LogarithmicDist-Mean” column provides the model mean Logarithmic Distance score on the training data.
- The “Validation\_LogarithmicDist-Mean” column provides the model mean Logarithmic Distance score on the test data.
- The “Training\_LogarithmicDist-Var” column provides the model Logarithmic Distance variance on the training data.
- The “Validation\_LogarithmicDist-Var” column provides the model Logarithmic Distance variance on the test data.
- The “Training\_PercentDifference-Mean” column provides the model mean Absolute Percent Difference score on the training data.
- The “Validation\_PercentDifference-Mean” column provides the model mean Absolute Percent Difference score on the test data.
- The “Training\_PercentDifference-Var” column provides the model Absolute Percent Difference variance on the training data.
- The “Validation\_PercentDifference-Var” column provides the model Absolute Percent Difference variance on the test data.

**Table S5:** Reconstruction results for Dataset 2 using a VAE architecture as described in the Methods section. The table columns are the same as in Table S4.

**Table S6:** Supervised latent space disentanglement of class and style attribute reconstruction and classification results for Dataset 1 using the JointVAE architecture as described in the Methods section. The table columns correspond to the following:

- The “label” column provides an abbreviated description of the model.
- The “Training\_Train\_Error\_itersToValue” column provides the number of training iterations required to reach the minimum model error on the training dataset.
- The “Validation\_Test\_Error\_itersToValue” column provides the number of training iterations required to reach the minimum model error on the test dataset.
- The “Training\_Train\_Error” column provides the model error on the training data.
- The “Validation\_Test\_Error” column provides the model error on the test data.
- The “Training\_CosineSimilarity-Mean” column provides the model mean cosine similarity score on the training data.
- The “Validation\_CosineSimilarity-Mean” column provides the model mean using cosine similarity score on the test data.
- The “Training\_CosineSimilarity-Var” column provides the model cosine similarity variance on the training data.
- The “Validation\_CosineSimilarity-Var” column model cosine similarity variance on the test data.

- The “Training\_PearsonR-Mean” column provides the model mean Pearson R score on the training data.
- The “Validation\_PearsonR-Mean” column provides the model mean Pearson R score on the test data.
- The “Training\_PearsonR-Var” column provides the model Pearson R variance on the training data.
- The “Validation\_PearsonR-Var” column provides the model Pearson R variance on the test data.
- The “Training\_EuclideanDist-Mean” column provides the model mean Euclidean Distance score on the training data.
- The “Validation\_EuclideanDist-Mean” column provides the model mean Euclidean Distance score on the test data.
- The “Training\_EuclideanDist-Var” column provides the model Euclidean Distance variance on the training data.
- The “Validation\_EuclideanDist-Var” column provides the model Euclidean Distance variance on the test data.
- The “Training\_ManhattanDist-Mean” column provides the model mean Manhattan Distance score on the training data.
- The “Validation\_ManhattanDist-Mean” column provides the model mean Manhattan Distance score on the test data.
- The “Training\_ManhattanDist-Var” column provides the model Manhattan Distance variance on the training data.
- The “Validation\_ManhattanDist-Var” column provides the model Manhattan Distance variance on the test data.
- The “Training\_JeffreysAndMatusitaDist-Mean” column provides the model mean Jeffrey’s and Matusita Distance score on the training data.
- The “Validation\_JeffreysAndMatusitaDist-Mean” column provides the model mean cosine similarity score on the training data.
- The “Training\_JeffreysAndMatusitaDist-Var” column provides the model Jeffrey’s and Matusita Distance variance on the training data.
- The “Validation\_JeffreysAndMatusitaDist-Var” column provides the model Jeffrey’s and Matusita Distance variance on the test data.
- The “Training\_LogarithmicDist-Mean” column provides the model mean Logarithmic Distance score on the training data.
- The “Validation\_LogarithmicDist-Mean” column provides the model mean Logarithmic Distance score on the test data.
- The “Training\_LogarithmicDist-Var” column provides the model Logarithmic Distance variance on the training data.
- The “Validation\_LogarithmicDist-Var” column provides the model Logarithmic Distance variance on the test data.
- The “Training\_PercentDifference-Mean” column provides the model mean Absolute Percent Difference score on the training data.
- The “Validation\_PercentDifference-Mean” column provides the model mean Absolute Percent Difference score on the test data.
- The “Training\_PercentDifference-Var” column provides the model Absolute Percent Difference variance on the training data.
- The “Validation\_PercentDifference-Var” column provides the model Absolute Percent Difference variance on the test data.
- The “Training\_AccuracyMCMicro” column provides the model accuracy on the training data.
- The “Validation\_AccuracyMCMicro” column provides the model accuracy on the test data.
- The “Training\_PrecisionMCMicro” column provides the model precision on the training data.
- The “Validation\_PrecisionMCMicro” column provides the model precision on the test data.

**Table S7:** Supervised latent space disentanglement of class and style attribute reconstruction and classification results for Dataset 2 using the JointVAE architecture as described in the Methods section. The table columns are the same as in Table S6.

**Table S8:** Semi-supervised latent space disentanglement of class and style attribute reconstruction and classification results for Datasets 1 and 2 using the JointVAE architecture as described in the Methods section. The table columns are the same as in Table S6.

**Table S9:** Unsupervised latent space disentanglement of class and style attribute reconstruction results for Datasets 1 and 2 using the JointVAE architecture as described in the Methods section. The table columns correspond to the following:

- The “label” column provides an abbreviated description of the model.
- The “Training\_Train\_Error\_itersToValue” column provides the number of training iterations to reach the minimum model error on the training data.
- The “Validation\_Test\_Error\_itersToValue” column provides the number of training iterations to reach the minimum model error on the test data.
- The “Training\_Train\_Error” column provides the model error on the training data.
- The “Validation\_Test\_Error” column provides the model error on the test data.
- The “Training\_CosineSimilarity-Mean” column provides the model mean cosine similarity score on the training data.
- The “Training\_EuclideanDist-Mean” column provides the model mean Euclidean Distance score on the training data.
- The “Validation\_EuclideanDist-Mean” column provides the model mean Euclidean Distance score on the test data.
- The “Training\_EuclideanDist-Var” column provides the model Euclidean Distance variance on the training data.
- The “Validation\_EuclideanDist-Var” column provides the model Euclidean Distance variance on the test data.
- The “Training\_PercentDifference-Mean” column provides the model mean Absolute Percent Difference score on the training data.
- The “Validation\_PercentDifference-Mean” column provides the model mean Absolute Percent Difference score on the test data.
- The “Training\_PercentDifference-Var” column provides the model Absolute Percent Difference variance on the training data.
- The “Validation\_PercentDifference-Var” column provides the model Absolute Percent Difference variance on the test data.

**Table S10:** Latent space classification results for Dataset 1 using the JointVAE architecture as described in the Methods section. The table columns correspond to the following:

- The “label” column provides an abbreviated description of the model.
- The “category” column provides the TRUE classification category.
- The “predicted” column provides the predicted classification category.
- The “input” provides the abbreviation for the sample targeted for prediction.
- The “Training\_Precision” column provides the precision of the classification prediction.

**Table S11:** Latent space classification results for Dataset 2 using the JointVAE architecture as described in the Methods section. The table columns are the same as in Table S10.

**Table S12:** Latent space traversal results for Dataset 1 using the JointVAE architecture and evaluation procedure as described in the Methods section. The table columns correspond to the following:

- The “label” column provides an abbreviated description of the model.
- The “step” column provides the discretized step in the continuous dimensions.
- The “gaussian\_node” column provides the continuous node which is traversed according to the “step” column.
- The “categorical\_node” column provides the discrete node selected.
- The “input” column is the expected class label.
- The “metric\_value” column provides the value of the evaluation metric used to compute reconstruction similarity.
- The “metric” column provides the metric used to compute the reconstruction similarity.

**Table S13:** Latent space traversal results for Dataset 2 using the JointVAE architecture and evaluation procedure as described in the Methods section. The table columns are the same as in Table S12.
